# Supplementary material for: Dion–Jacobson A′MiiiNaNb3O10 (A′ = Rb, Cs; M(iii) = Sm, Bi) and RbSmNa2Nb4O13 layered perovskites and their luminescent function
Source: Royal Society of Chemistry journal article supplement (doi:10.1039/d2tc03179e), 2022-01-01
Supplement: d2tc03179e1.pdf [file d2tc03179e1.pdf]

### Electronic Supplementary Information

for

Dion-Jacobson  $A'M^{III}NaNb_3O_{10}$  ( $A' = Rb, Cs$ ;  $M(III) = Sm, Bi$ ),  $RbSmNa_2Nb_4O_{13}$

layered perovskites and their luminescent function

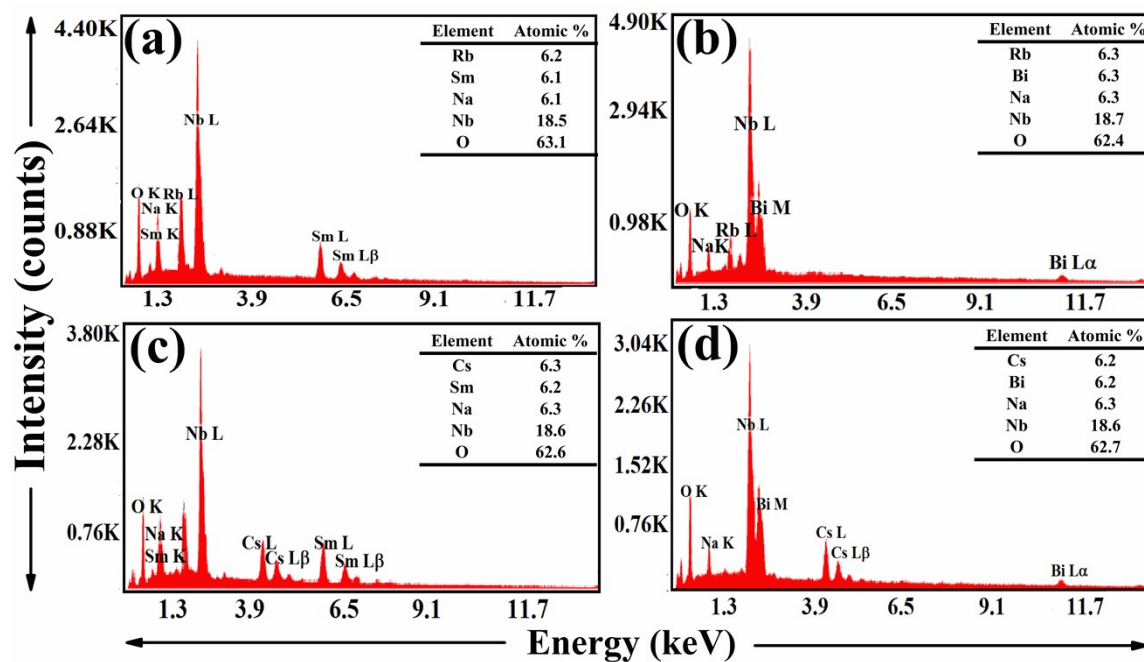

**Fig. S1** EDS spectra of (a)  $RbSmNaNb_3O_{10}$ , (b)  $RbBiNaNb_3O_{10}$ , (c)  $CsSmNaNb_3O_{10}$ , (d)  $CsBiNaNb_3O_{10}$ .

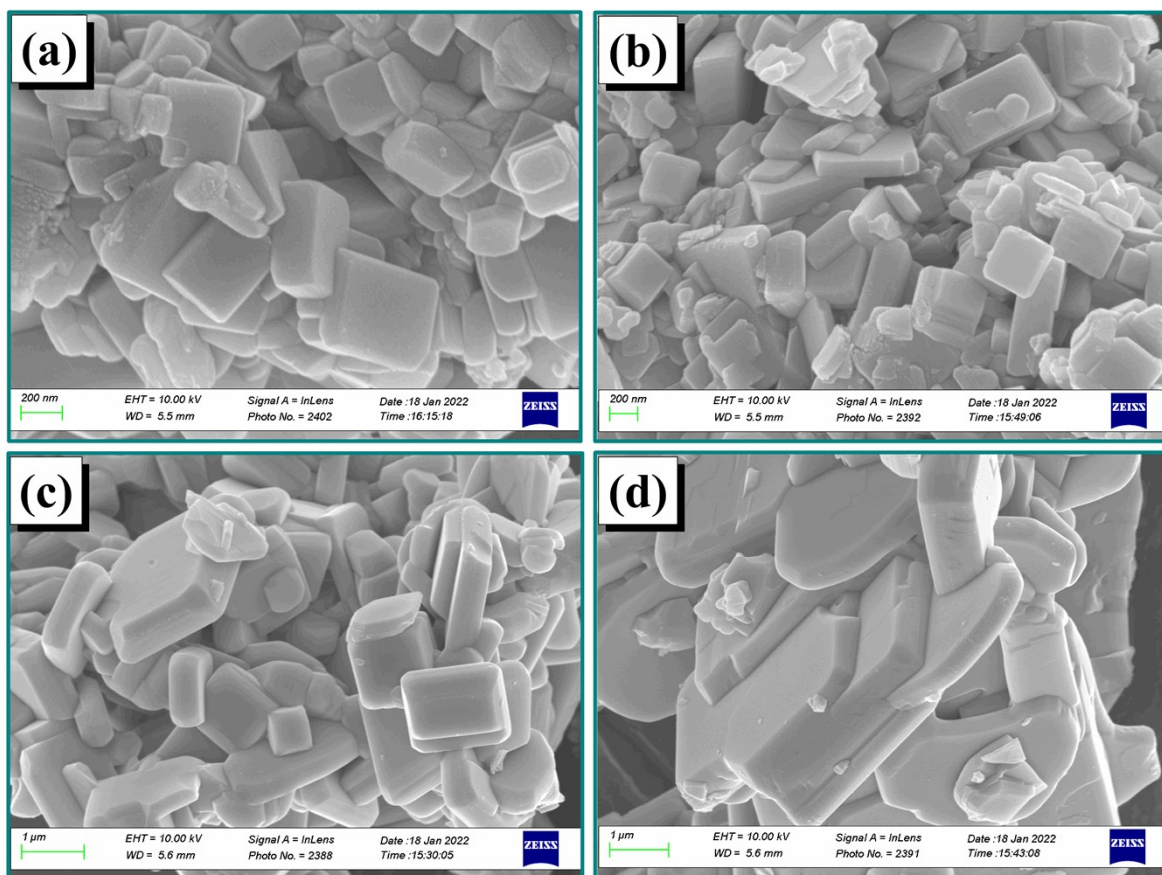

**Fig. S2** FESEM images of (a) RbSmNaNb<sub>3</sub>O<sub>10</sub>, (b) RbBiNaNb<sub>3</sub>O<sub>10</sub>, (c) CsSmNaNb<sub>3</sub>O<sub>10</sub>, and (d) CsBiNaNb<sub>3</sub>O<sub>10</sub>.

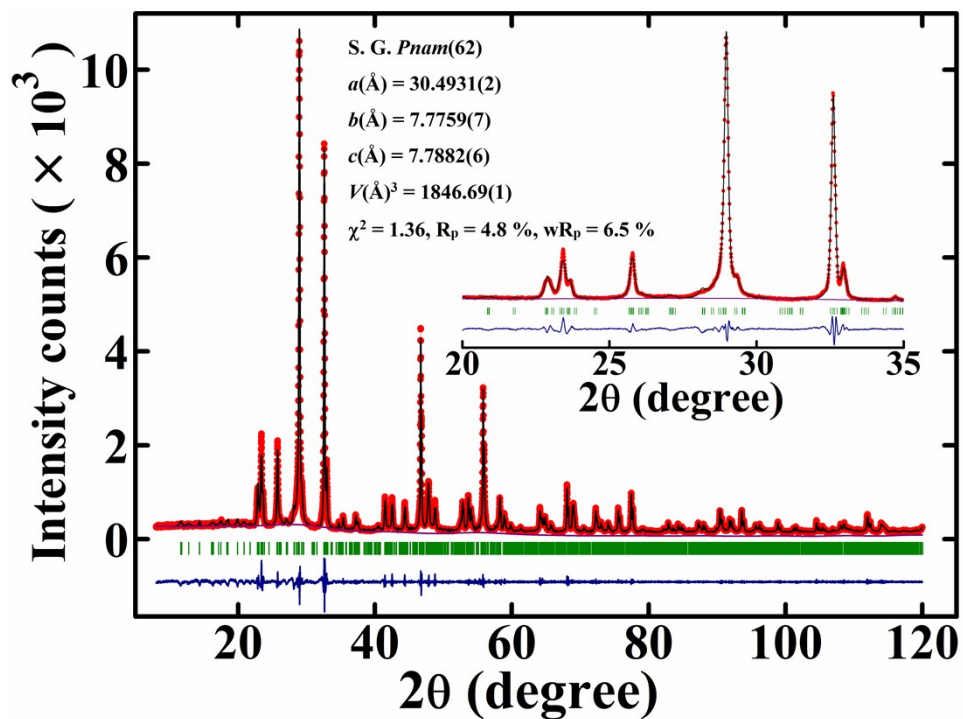

**Fig. S3** Experimentally observed PXRD pattern of  $\text{CsLaNaNb}_3\text{O}_{10}$  (data in red), profile matching (data in black), difference profile (data in blue), and vertical bars (data in green) indicating Bragg reflections.

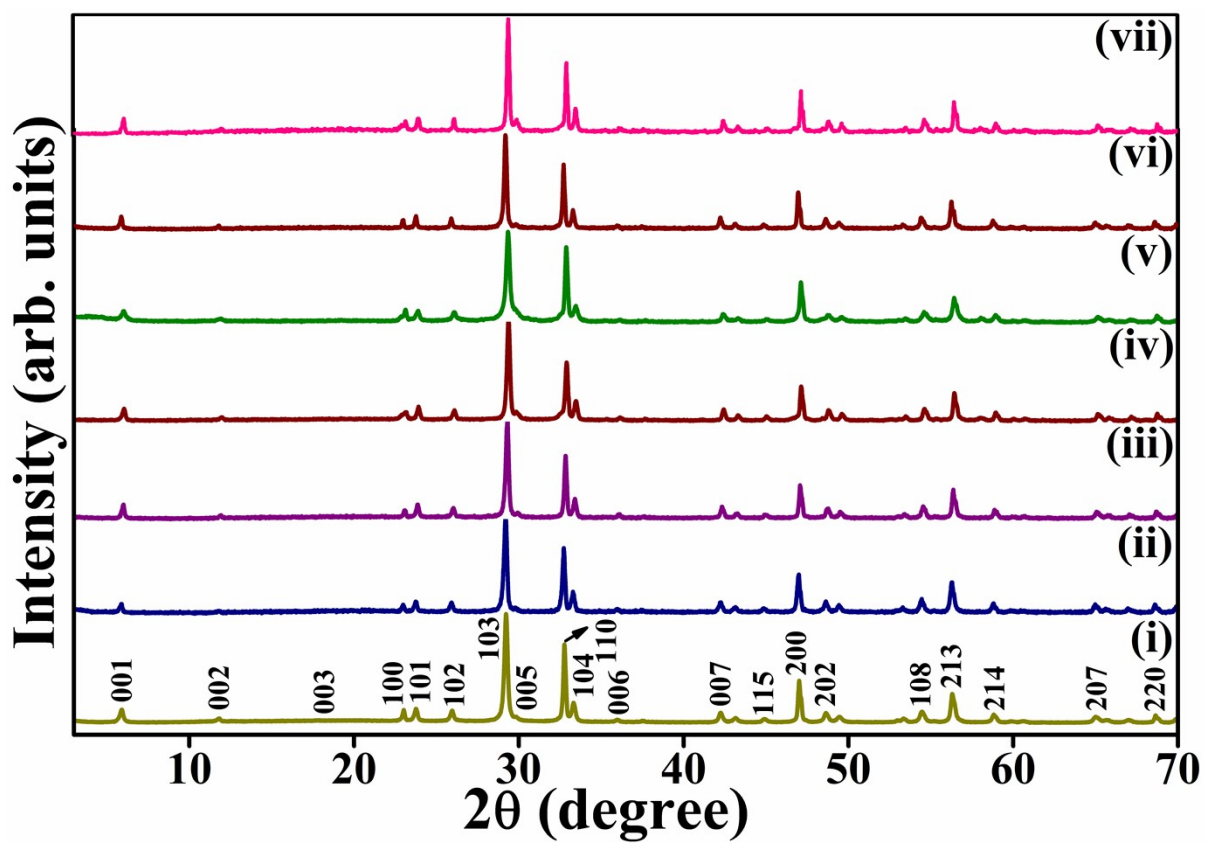

Fig. S4 PXRD patterns of RbSmNaNb<sub>3</sub>O<sub>10</sub> (i), 1 (ii), 2 (iii), 5 (iv), 7 (v), 10 (vi) mol % Eu<sup>3+</sup> and 5 mol % (vii) Tb<sup>3+</sup>-doped samples.

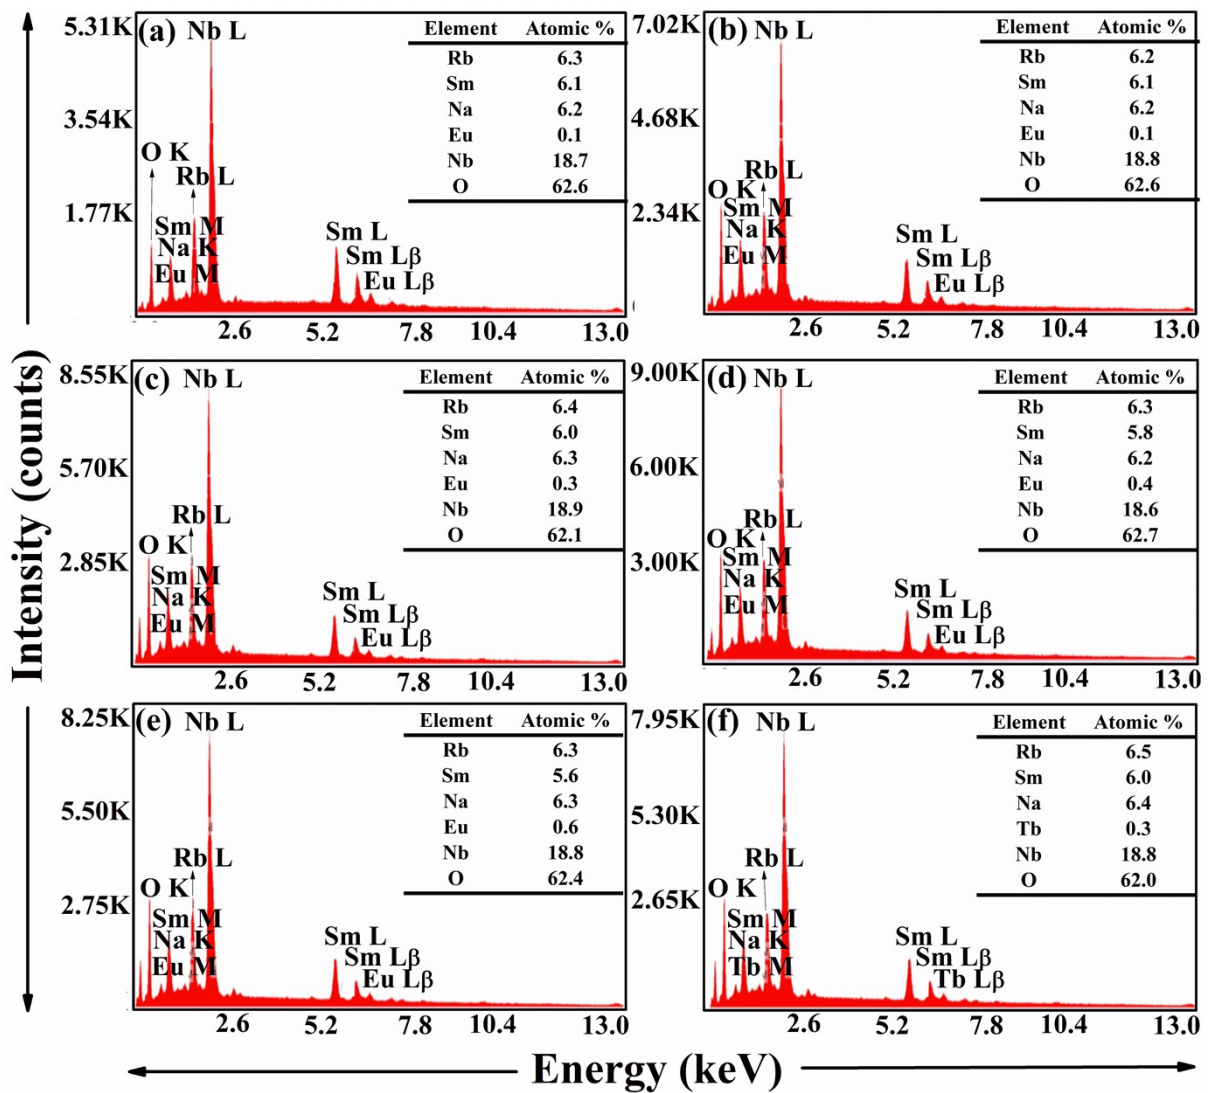

**Fig. S5** EDS spectra of RbSmNaNb<sub>3</sub>O<sub>10</sub> doped with (a) 1, (b) 2, (c) 5, (d) 7, (e) 10 mol % Eu<sup>3+</sup> and (f) 5 mol % Tb<sup>3+</sup>.

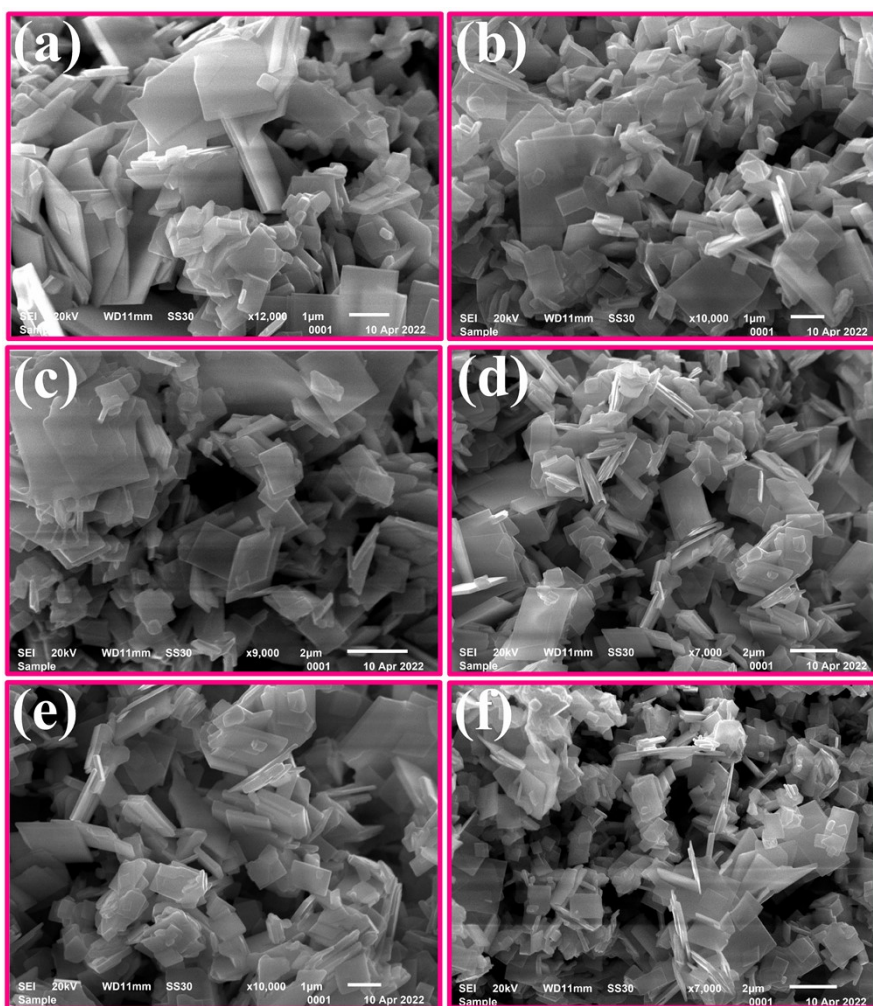

**Fig. S6** SEM images of RbSmNaNb<sub>3</sub>O<sub>10</sub> doped with (a) 1, (b) 2, (c) 5, (d) 7, (e) 10 mol % Eu<sup>3+</sup> and (f) 5 mol % Tb<sup>3+</sup>.

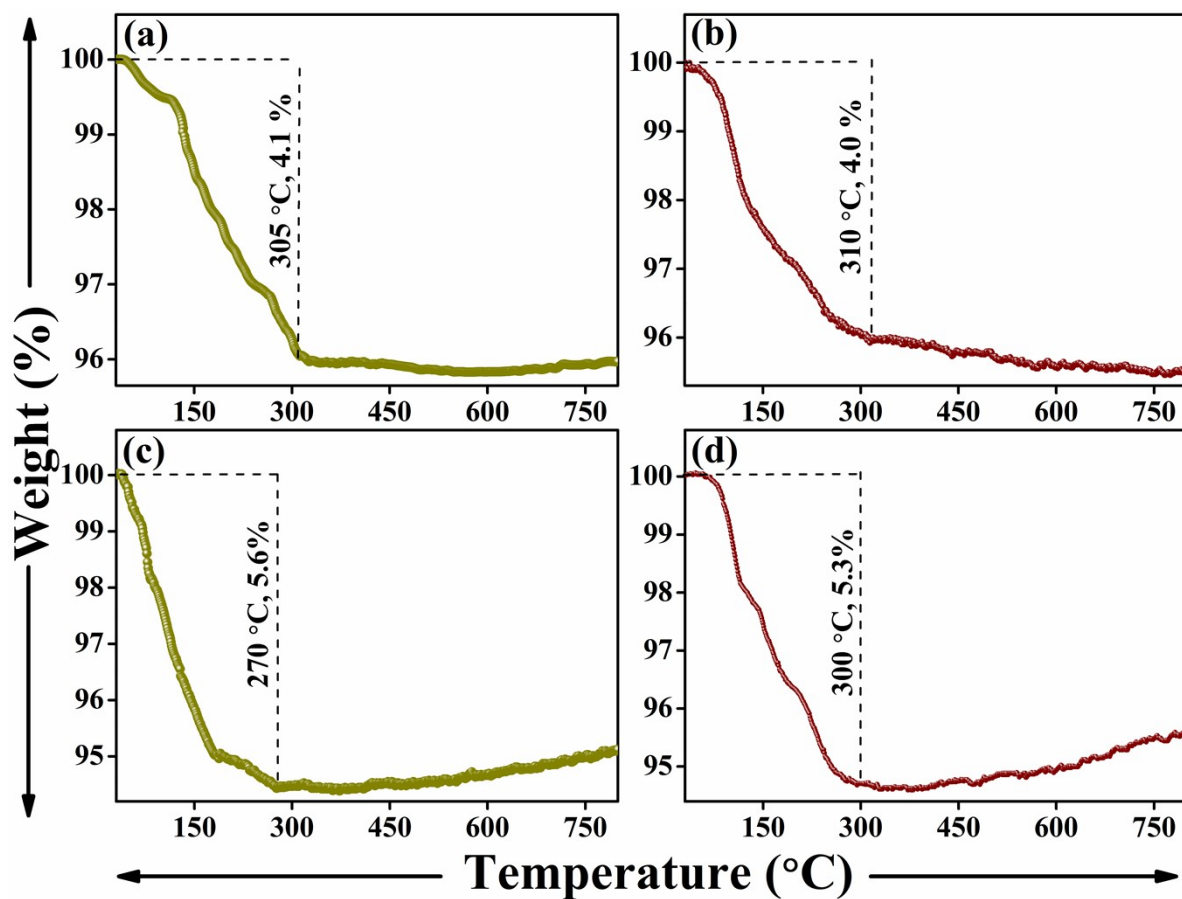

**Fig. S7** TG traces of (a, b) proton and (c, d) sodium exchanged samples of parent  $\text{RbSmNaNb}_3\text{O}_{10}$  and  $\text{RbBiNaNb}_3\text{O}_{10}$ , respectively.

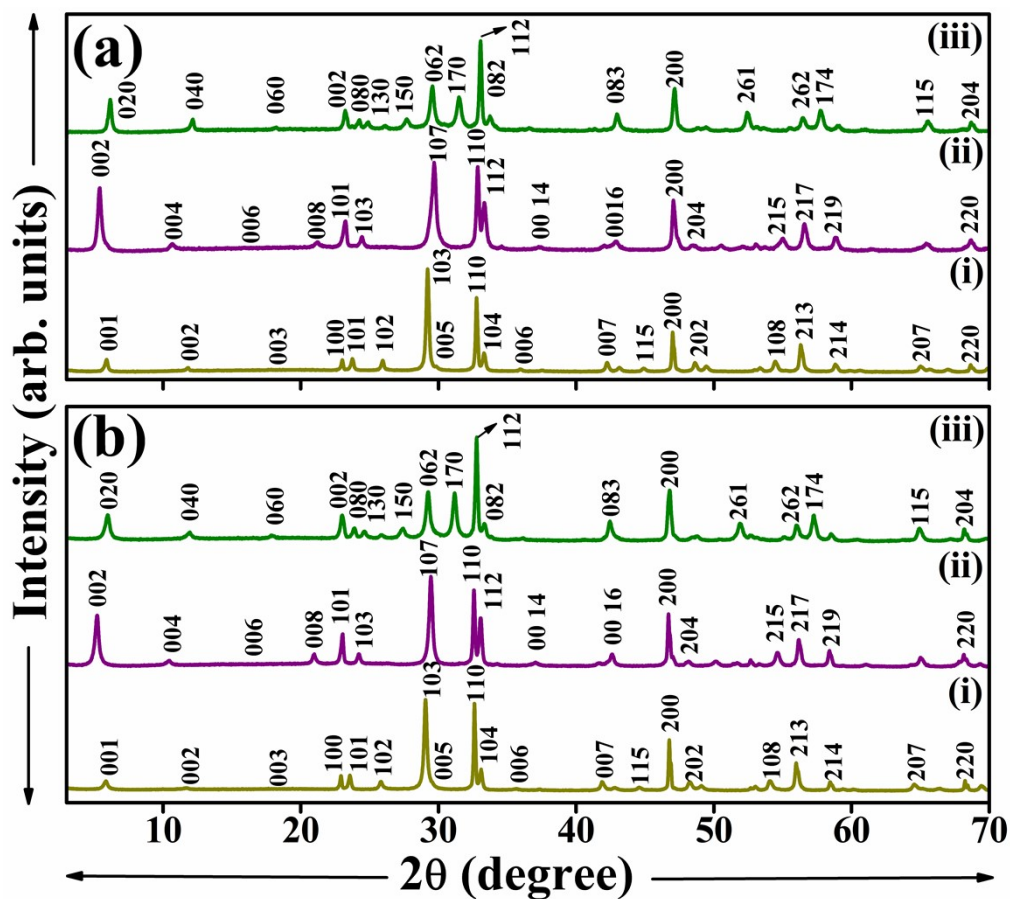

**Fig. S8**(a) PXR patterns of RbSmNaNb<sub>3</sub>O<sub>10</sub> (i) and the ion-exchanged products Na(SmNa)Nb<sub>3</sub>O<sub>10</sub>·2H<sub>2</sub>O (ii), K(SmNa)Nb<sub>3</sub>O<sub>10</sub> (iii), and (b) PXR patterns of RbBiNaNb<sub>3</sub>O<sub>10</sub> (i) and the ion-exchanged products Na(BiNa)Nb<sub>3</sub>O<sub>10</sub>·2H<sub>2</sub>O (ii), K(BiNa)Nb<sub>3</sub>O<sub>10</sub> (iii).



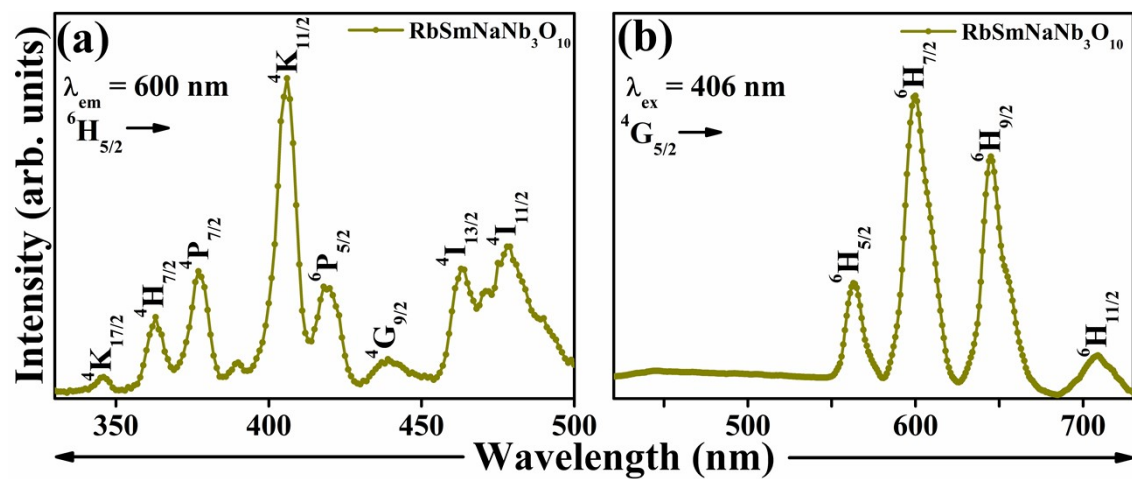

Fig. S9 (a) PL excitation and (b) emission spectra of  $\text{RbSmNaNb}_3\text{O}_{10}$  sample.

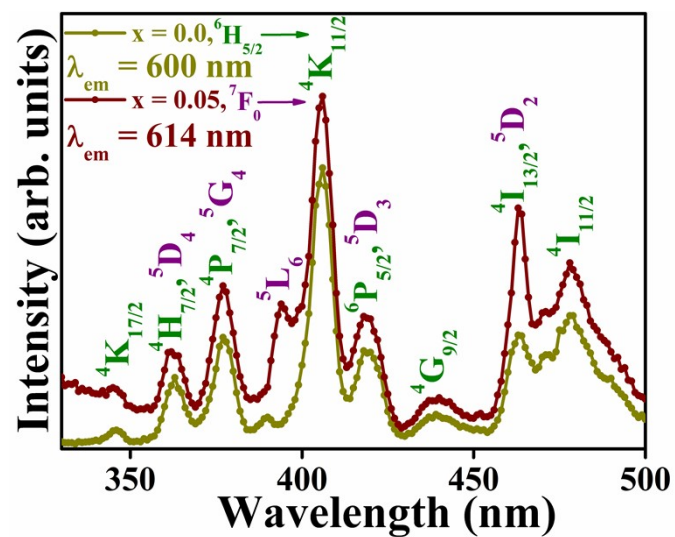

**Fig. S10** Excitation spectra of RbSmNaNb<sub>3</sub>O<sub>10</sub> doped with 5 mol % Eu<sup>3+</sup> doped samples.

**Table S1(a)** Positional, occupancies and thermal parameters of CsSmNaNb<sub>3</sub>O<sub>10</sub> and CsBiNaNb<sub>3</sub>O<sub>10</sub>.

| Atoms                                                                                                                                                                                                                                               | Wyckoff position | <i>x/a</i> | <i>y/b</i>  | <i>z/c</i> | SOF | U(iso)Å <sup>2</sup> |
|-----------------------------------------------------------------------------------------------------------------------------------------------------------------------------------------------------------------------------------------------------|------------------|------------|-------------|------------|-----|----------------------|
| Cs1                                                                                                                                                                                                                                                 | 4c               | 0.2574(1)  | 0.2624(9)   | 0.25       | 1   | 0.0251(14)           |
| Cs2                                                                                                                                                                                                                                                 | 4c               | 0.2465(2)  | 0.7498(1)   | 0.25       | 1   | 0.0254(17)           |
| Sm/Na1                                                                                                                                                                                                                                              | 4c               | 0.0720(4)  | 0.2722(2)   | 0.25       | 0.5 | 0.0243(28)           |
| Sm/Na2                                                                                                                                                                                                                                              | 4c               | 0.0722(3)  | 0.7605(2)   | 0.25       | 0.5 | 0.0247(26)           |
| Sm/Na3                                                                                                                                                                                                                                              | 4c               | 0.4253(4)  | 0.2468(18)  | 0.25       | 0.5 | 0.0247(14)           |
| Sm/Na4                                                                                                                                                                                                                                              | 4c               | 0.4285(3)  | 0.7322(14)  | 0.25       | 0.5 | 0.0244(23)           |
| Nb1                                                                                                                                                                                                                                                 | 4a               | 0.0        | 0.0         | 0.0        | 1   | 0.0248(18)           |
| Nb2                                                                                                                                                                                                                                                 | 4b               | 0.0        | 0.5         | 0.0        | 1   | 0.0248(22)           |
| Nb3                                                                                                                                                                                                                                                 | 8d               | 0.1402(3)  | 0.0084(11)  | 0.0021(10) | 1   | 0.0236(14)           |
| Nb4                                                                                                                                                                                                                                                 | 8d               | 0.3597(2)  | 0.0014(9)   | 0.0017(8)  | 1   | 0.0238(12)           |
| O1                                                                                                                                                                                                                                                  | 8d               | 0.1992(4)  | 0.516(5)    | 0.506(4)   | 1   | 0.015(4)             |
| O2                                                                                                                                                                                                                                                  | 8d               | 0.1983(4)  | 0.0236(35)  | 0.0185(29) | 1   | 0.020(5)             |
| O3                                                                                                                                                                                                                                                  | 8d               | 0.4347(5)  | 0.476(4)    | 0.0507(21) | 1   | 0.022(6)             |
| O4                                                                                                                                                                                                                                                  | 8d               | 0.0596(5)  | 0.5480(26)  | 0.0423(27) | 1   | 0.043(8)             |
| O5                                                                                                                                                                                                                                                  | 8d               | 0.0080(7)  | 0.2345(6)   | 0.0638(20) | 1   | 0.047(7)             |
| O6                                                                                                                                                                                                                                                  | 8d               | 0.1180(4)  | 0.2128(23)  | 0.506(4)   | 1   | 0.010(4)             |
| O7                                                                                                                                                                                                                                                  | 8d               | 0.3722(5)  | 0.230(4)    | 0.500(5)   | 1   | 0.015(4)             |
| O8                                                                                                                                                                                                                                                  | 4c               | 0.5075(2)  | 0.528(5)    | 0.25       | 1   | 0.017(9)             |
| O9                                                                                                                                                                                                                                                  | 4c               | 0.4836(9)  | 0.956(5)    | 0.25       | 1   | 0.043(13)            |
| O10                                                                                                                                                                                                                                                 | 4c               | 0.1189(5)  | 0.0156(6)   | 0.25       | 1   | 0.0235(12)           |
| O11                                                                                                                                                                                                                                                 | 4c               | 0.3799(8)  | 0.0115(3)   | 0.25       | 1   | 0.0252(10)           |
| O12                                                                                                                                                                                                                                                 | 4c               | 0.1324(6)  | 0.485(4)    | 0.25       | 1   | 0.0249(15)           |
| O13                                                                                                                                                                                                                                                 | 4c               | 0.3721(9)  | 0.477(7)    | 0.25       | 1   | 0.0255(15)           |
| Space group: <i>Pnam</i> (62); <i>a</i> (Å) = 30.2952(2), <i>b</i> (Å) = 7.7548(5), <i>c</i> (Å) = 7.7559(6), <i>V</i> (Å <sup>3</sup> ) = 1822.14(2); <i>Z</i> = 8; $\chi^2 = 1.1$ , <i>R<sub>p</sub></i> = 3.9 %, <i>R<sub>wp</sub></i> = 5.3 %.  |                  |            |             |            |     |                      |
| Cs1                                                                                                                                                                                                                                                 | 4c               | 0.2570(2)  | 0.2574(18)  | 0.25       | 1   | 0.0288(18)           |
| Cs2                                                                                                                                                                                                                                                 | 4c               | 0.2470(1)  | 0.7499(21)  | 0.25       | 1   | 0.0300(17)           |
| Bi/Na1                                                                                                                                                                                                                                              | 4c               | 0.0726(3)  | 0.2659(21)  | 0.25       | 0.5 | 0.0319(23)           |
| Bi/Na2                                                                                                                                                                                                                                              | 4c               | 0.0730(2)  | 0.7579(21)  | 0.25       | 0.5 | 0.0366(20)           |
| Bi/Na3                                                                                                                                                                                                                                              | 4c               | 0.4256(2)  | 0.2422(21)  | 0.25       | 0.5 | 0.0291(21)           |
| Bi/Na4                                                                                                                                                                                                                                              | 4c               | 0.4277(2)  | 0.7274(23)  | 0.25       | 0.5 | 0.0357(21)           |
| Nb1                                                                                                                                                                                                                                                 | 4b               | 0.0        | 0.5         | 0.0        | 1   | 0.0138(23)           |
| Nb2                                                                                                                                                                                                                                                 | 8d               | 0.1415(7)  | 0.0072(10)  | 0.0016(7)  | 1   | 0.0222(19)           |
| Nb3                                                                                                                                                                                                                                                 | 8d               | 0.3595(7)  | 0.0007(9)   | 0.0018(7)  | 1   | 0.0197(19)           |
| Nb4                                                                                                                                                                                                                                                 | 4a               | 0.0        | 0.0         | 0.0        | 1   | 0.0286(29)           |
| O1                                                                                                                                                                                                                                                  | 8d               | 0.2021(4)  | 0.491(6)    | 0.509(5)   | 1   | 0.026(10)            |
| O2                                                                                                                                                                                                                                                  | 8d               | 0.1978(4)  | 0.042(4)    | 0.021(4)   | 1   | 0.027(12)            |
| O3                                                                                                                                                                                                                                                  | 8d               | 0.4321(5)  | 0.4571(34)  | 0.0395(32) | 1   | 0.051(10)            |
| O4                                                                                                                                                                                                                                                  | 8d               | 0.0552(4)  | 0.543(4)    | 0.026(4)   | 1   | 0.025(9)             |
| O5                                                                                                                                                                                                                                                  | 8d               | 0.0045(10) | 0.2355(7)   | 0.0600(26) | 1   | 0.014(6)             |
| O6                                                                                                                                                                                                                                                  | 8d               | 0.1208(5)  | 0.243(7)    | 0.520(6)   | 1   | 0.0249(11)           |
| O7                                                                                                                                                                                                                                                  | 8d               | 0.3650(5)  | 0.25065(31) | 0.512(6)   | 1   | 0.031(7)             |
| O8                                                                                                                                                                                                                                                  | 4c               | 0.5049(12) | 0.552(7)    | 0.25       | 1   | 0.010(8)             |
| O9                                                                                                                                                                                                                                                  | 4c               | 0.4960(13) | 0.552(7)    | 0.25       | 1   | 0.047(13)            |
| O10                                                                                                                                                                                                                                                 | 4c               | 0.1220(8)  | 0.0086(7)   | 0.25       | 1   | 0.012(13)            |
| O11                                                                                                                                                                                                                                                 | 4c               | 0.3769(8)  | 0.002(7)    | 0.25       | 1   | 0.0244(13)           |
| O12                                                                                                                                                                                                                                                 | 4c               | 0.1306(8)  | 0.489(7)    | 0.25       | 1   | 0.039(17)            |
| O13                                                                                                                                                                                                                                                 | 4c               | 0.3557(9)  | 0.507(7)    | 0.25       | 1   | 0.051(15)            |
| Space group: <i>Pnam</i> (62); <i>a</i> (Å) = 30.5260(9), <i>b</i> (Å) = 7.7990(2), <i>c</i> (Å) = 7.8058(2), <i>V</i> (Å <sup>3</sup> ) = 1858.36(16); <i>Z</i> = 8; $\chi^2 = 1.2$ , <i>R<sub>p</sub></i> = 6.7 %, <i>R<sub>wp</sub></i> = 8.7 %. |                  |            |             |            |     |                      |

**Table S1(b)** Selected bond distances, theoretical and calculated BVS for CsSmNaNb<sub>3</sub>O<sub>10</sub>.

| Atoms      | Interatomic distances (Å) | Theoretical BVS | Calculated BVS |
|------------|---------------------------|-----------------|----------------|
| Cs1-O1     | 2.997(5) × 2              | 1.0             | 1.13           |
| Cs1-O1     | 3.299(4) × 2              |                 |                |
| Cs1-O2     | 3.127(5) × 2              |                 |                |
| Cs1-O2     | 3.210(5) × 2              |                 |                |
| Cs2-O1     | 3.042(6) × 2              | 1.0             | 1.11           |
| Cs2-O1     | 3.253(6) × 2              |                 |                |
| Cs2-O2     | 3.148(6) × 2              |                 |                |
| Cs2-O2     | 3.188(5) × 2              |                 |                |
| Sm/Na1-O4  | 2.723(10) × 2             | 2.0             | 2.03           |
| Sm/Na1-O5  | 2.434(18) × 2             |                 |                |
| Sm/Na1-O6  | 2.473(7) × 2              |                 |                |
| Sm/Na1-O8  | 3.023(12) × 1             |                 |                |
| Sm/Na1-O9  | 3.422(12) × 1             |                 |                |
| Sm/Na1-O10 | 2.425(12) × 1             |                 |                |
| Sm/Na1-O12 | 2.480(12) × 1             |                 |                |
| Sm/Na1-O3  | 3.264(8) × 2              |                 |                |
| Sm/Na2-O4  | 2.393(9) × 2              | 2.0             | 1.97           |
| Sm/Na2-O5  | 3.442(7) × 2              |                 |                |
| Sm/Na2-O7  | 2.582(7) × 2              |                 |                |
| Sm/Na2-O8  | 2.508(11) × 1             |                 |                |
| Sm/Na2-O9  | 3.212(10) × 1             |                 |                |
| Sm/Na2-O10 | 2.366(12) × 1             |                 |                |
| Sm/Na2-O12 | 2.867(11) × 1             |                 |                |
| Sm/Na2-O3  | 2.830(7) × 2              |                 |                |
| Sm/Na3-O13 | 2.361(12) × 1             | 2.0             | 2.22           |
| Sm/Na3-O4  | 2.808(8) × 2              |                 |                |
| Sm/Na3-O5  | 2.912(12) × 2             |                 |                |
| Sm/Na3-O7  | 2.512(7) × 2              |                 |                |
| Sm/Na3-O8  | 3.300(12) × 1             |                 |                |
| Sm/Na3-O9  | 2.912(12) × 1             |                 |                |
| Sm/Na3-O11 | 2.307(12) × 1             |                 |                |
| Sm/Na3-O3  | 2.341(9) × 2              |                 |                |
| Sm/Na4-O13 | 2.657(10) × 1             | 2.0             | 2.04           |
| Sm/Na4-O4  | 1.871(10) × 2             |                 |                |
| Sm/Na4-O5  | 3.090(11) × 2             |                 |                |
| Sm/Na4-O6  | 2.363(6) × 2              |                 |                |
| Sm/Na4-O8  | 2.876(10) × 1             |                 |                |
| Sm/Na4-O9  | 2.366(10) × 1             |                 |                |
| Sm/Na4-O11 | 2.596(11) × 1             |                 |                |
| Sm/Na4-O3  | 2.558(9) × 2              |                 |                |

|         |                      |     |      |
|---------|----------------------|-----|------|
| Nb1-O4  | $1.871(10) \times 2$ | 5.0 | 4.78 |
| Nb1-O5  | $2.131(6) \times 2$  |     |      |
| Nb1-O9  | $2.030(10) \times 2$ |     |      |
| Nb2-O2  | $1.779(7) \times 1$  | 5.0 | 5.12 |
| Nb2-O13 | $1.998(7) \times 1$  |     |      |
| Nb2-O6  | $1.800(8) \times 1$  |     |      |
| Nb2-O7  | $2.181(8) \times 1$  |     |      |
| Nb2-O10 | $2.031(7) \times 1$  |     |      |
| Nb2-O3  | $2.309(7) \times 1$  |     |      |
| Nb3-O1  | $1.775(7) \times 1$  | 5.0 | 4.85 |
| Nb3-O4  | $2.514(7) \times 1$  |     |      |
| Nb3-O6  | $2.243(7) \times 1$  |     |      |
| Nb3-O7  | $1.836(7) \times 1$  |     |      |
| Nb3-O11 | $2.027(6) \times 1$  |     |      |
| Nb3-O12 | $1.973(6) \times 1$  |     |      |
| Nb4-O5  | $1.900(6) \times 2$  | 5.0 | 5.25 |
| Nb4-O8  | $1.964(10) \times 2$ |     |      |
| Nb4-O3  | $2.026(12) \times 2$ |     |      |

**Table S1(c)** Selected bond distances, theoretical and calculated BVS for CsBiNaNb<sub>3</sub>O<sub>10</sub>.

| Atoms      | Interatomic distances (Å) | Theoretical BVS | Calculated BVS |
|------------|---------------------------|-----------------|----------------|
| Cs1-O1     | 3.185(4) × 2              | 1.0             | 1.05           |
| Cs1-O1     | 3.122(6) × 2              |                 |                |
| Cs1-O2     | 3.068(5) × 2              |                 |                |
| Cs1-O2     | 3.348(5) × 2              |                 |                |
| Cs2-O1     | 3.021(5) × 2              | 1.0             | 1.06           |
| Cs2-O1     | 3.263(5) × 2              |                 |                |
| Cs2-O2     | 3.209(6) × 2              |                 |                |
| Cs2-O2     | 3.211(5) × 2              |                 |                |
| Bi/Na1-O4  | 2.741(3) × 2              | 2.0             | 1.79           |
| Bi/Na1-O5  | 2.576(7) × 2              |                 |                |
| Bi/Na1-O6  | 2.547(5) × 2              |                 |                |
| Bi/Na1-O8  | 3.283(6) × 1              |                 |                |
| Bi/Na1-O9  | 3.248(6) × 1              |                 |                |
| Bi/Na1-O10 | 2.498(4) × 1              |                 |                |
| Bi/Na1-O12 | 2.494(3) × 1              |                 |                |
| Bi/Na1-O3  | 3.246(5) × 2              |                 |                |
| Bi/Na2-O4  | 2.391(6) × 2              | 2.0             | 1.89           |
| Bi/Na2-O5  | 3.379(4) × 2              |                 |                |
| Bi/Na2-O7  | 2.696(5) × 2              |                 |                |
| Bi/Na2-O8  | 2.621(6) × 1              |                 |                |
| Bi/Na2-O9  | 2.847(6) × 1              |                 |                |
| Bi/Na2-O10 | 2.451(4) × 1              |                 |                |
| Bi/Na2-O12 | 2.767(3) × 1              |                 |                |
| Bi/Na2-O3  | 2.755(5) × 2              |                 |                |
| Bi/Na3-O13 | 2.872(3) × 1              | 2.0             | 1.89           |
| Bi/Na3-O4  | 2.799(5) × 2              |                 |                |
| Bi/Na3-O5  | 2.768(6) × 2              |                 |                |
| Bi/Na3-O7  | 2.721(5) × 2              |                 |                |
| Bi/Na3-O8  | 3.362(5) × 1              |                 |                |
| Bi/Na3-O9  | 3.147(6) × 1              |                 |                |
| Bi/Na3-O11 | 2.293(4) × 1              |                 |                |
| Bi/Na3-O3  | 2.425(2) × 2              |                 |                |
| Bi/Na4-O13 | 2.705(2) × 1              | 2.0             | 1.74           |
| Bi/Na4-O4  | 3.369(6) × 2              |                 |                |
| Bi/Na4-O5  | 3.248(3) × 2              |                 |                |
| Bi/Na4-O6  | 2.413(4) × 2              |                 |                |
| Bi/Na4-O8  | 2.652(5) × 1              |                 |                |
| Bi/Na4-O9  | 2.688(2) × 1              |                 |                |
| Bi/Na4-O11 | 2.667(5) × 1              |                 |                |
| Bi/Na4-O3  | 2.659(2) × 2              |                 |                |

---

|         |                     |     |      |
|---------|---------------------|-----|------|
| Nb1-O4  | $1.828(5) \times 2$ | 5.0 | 5.20 |
| Nb1-O5  | $2.120(5) \times 2$ |     |      |
| Nb1-O9  | $2.000(6) \times 2$ |     |      |
| Nb2-O2  | $1.734(5) \times 1$ | 5.0 | 4.93 |
| Nb2-O13 | $1.963(6) \times 1$ |     |      |
| Nb2-O6  | $2.073(6) \times 1$ |     |      |
| Nb2-O7  | $2.000(7) \times 1$ |     |      |
| Nb2-O10 | $2.033(6) \times 1$ |     |      |
| Nb2-O3  | $2.356(7) \times 1$ |     |      |
| Nb3-O1  | $1.860(5) \times 1$ | 5.0 | 4.73 |
| Nb3-O4  | $2.558(7) \times 1$ |     |      |
| Nb3-O6  | $1.959(6) \times 1$ |     |      |
| Nb3-O7  | $1.958(5) \times 1$ |     |      |
| Nb3-O11 | $2.027(6) \times 1$ |     |      |
| Nb3-O12 | $1.987(6) \times 1$ |     |      |
| Nb4-O5  | $1.900(2) \times 2$ | 5.0 | 5.07 |
| Nb4-O8  | $1.994(6) \times 2$ |     |      |
| Nb4-O3  | $2.039(6) \times 2$ |     |      |

---
